# Supplementary material for: Mineralization of malachite green dye over visible light responsive bismuth doped TiO2–ZrO2 ferromagnetic nanocomposites
Source: Royal Society of Chemistry journal article supplement (doi:10.1039/c4nj01618a), 2015-01-01
Supplement: c4nj01618a1.pdf [file c4nj01618a1.pdf]

**Mineralization of malachite green dye over visible light responsive bismuth doped TiO<sub>2</sub>-  
ZrO<sub>2</sub> ferromagnetic nanocomposites**

**Archana Charanpahari<sup>1</sup>, Sachin G. Ghugal<sup>1</sup>, Suresh S. Umare<sup>1\*</sup>, Rajamma Sasikala<sup>2\*\*</sup>**

**Electronic Supplementary Information (ESI)**

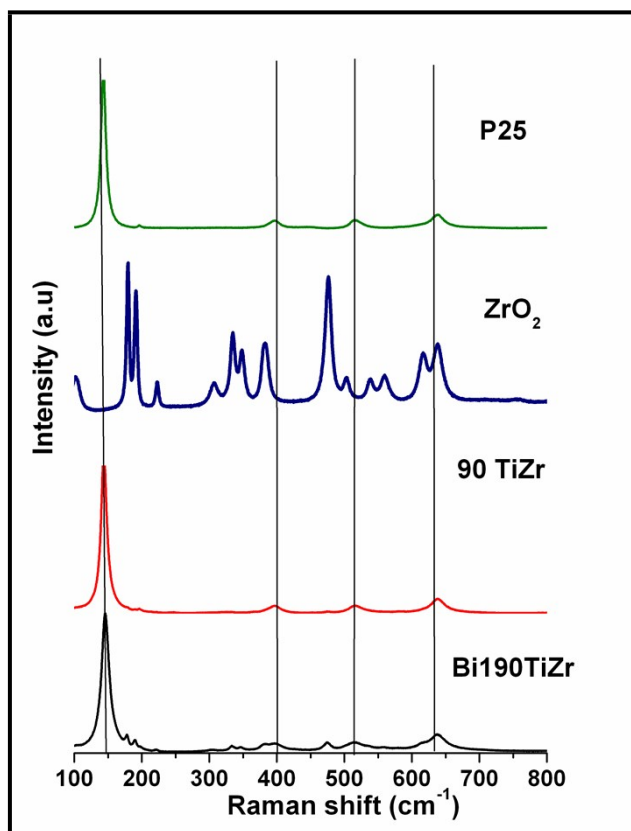

Fig S1. Full Raman spectrum of 1Bi90TiZr, 90TiZr, ZrO<sub>2</sub>, P25

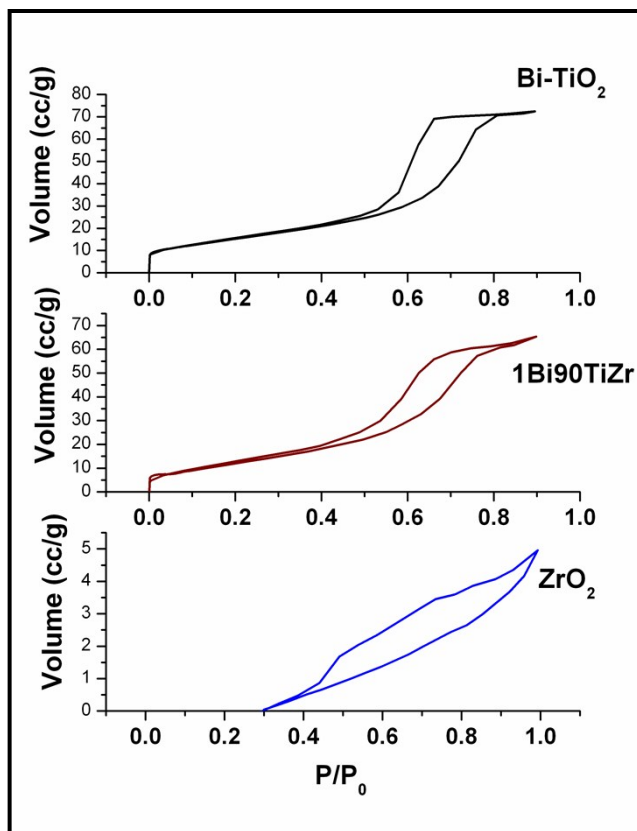

Fig S2. Adsorption isotherms for ZrO<sub>2</sub>, 1Bi90TiZr, Bi-TiO<sub>2</sub>

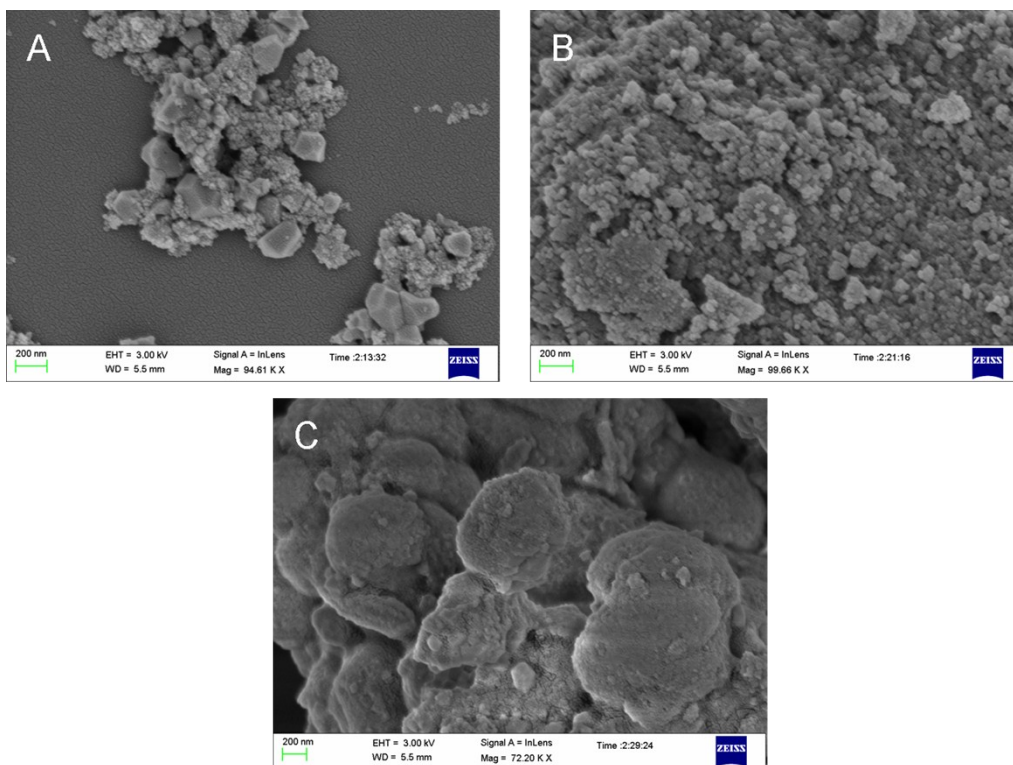

S3. SEM of A. 1Bi90TiZr B. Bi-TiO<sub>2</sub>, C. ZrO<sub>2</sub>

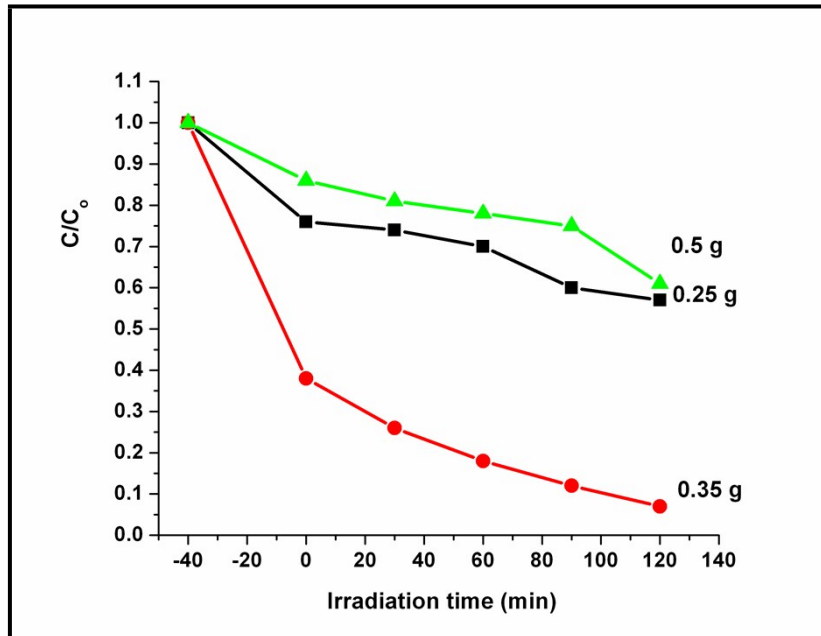

S4 . Photodegradation of 20 ppm malachite green with various 1Bi90TiZr catalyst loading.

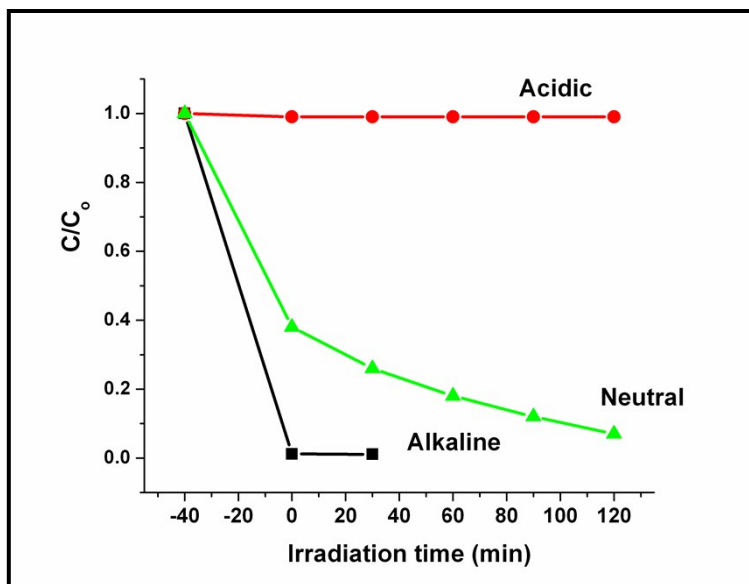

S5. Effect of pH on photodegradation of 20 ppm malachite green for  $1\text{Bi}90\text{TiZr}$  catalyst

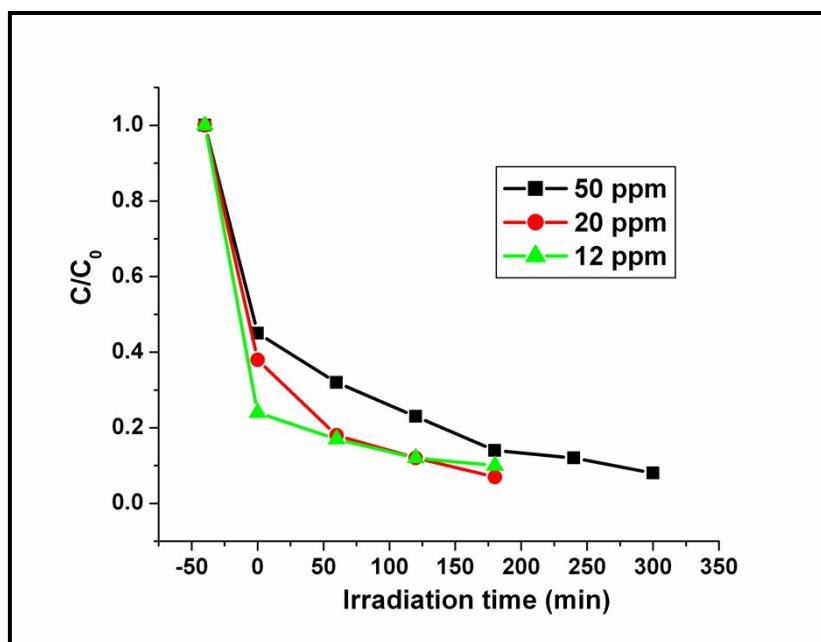

S6. Photodegradation of 20 ppm malachite green with various initial dye concentration for  $1\text{Bi}90\text{TiZr}$  catalyst.

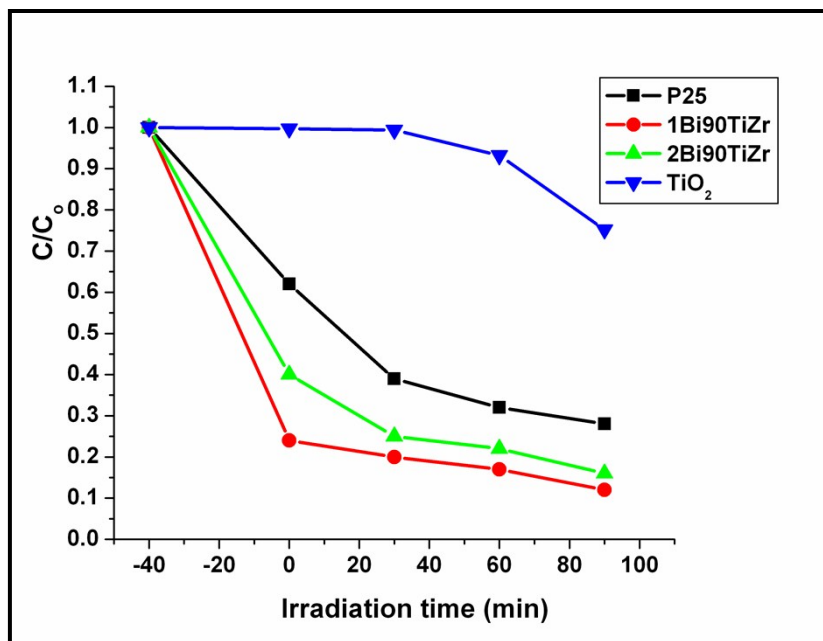

S7. Photodegradation of 20 ppm malachite green with two different Bi dopant contents

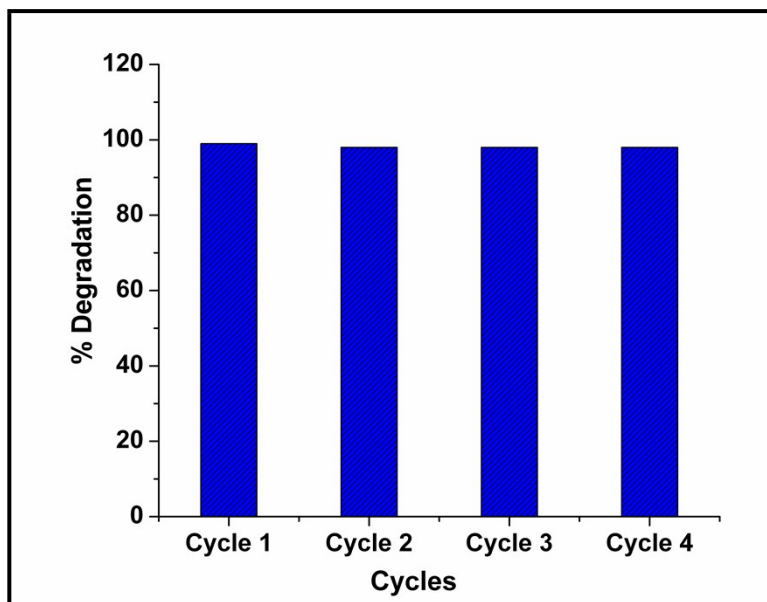

S8. Recyclability of 1Bi90TiZr for degradation of 20 ppm Malachite green

(Cycle 1: Fresh photocatalyst).

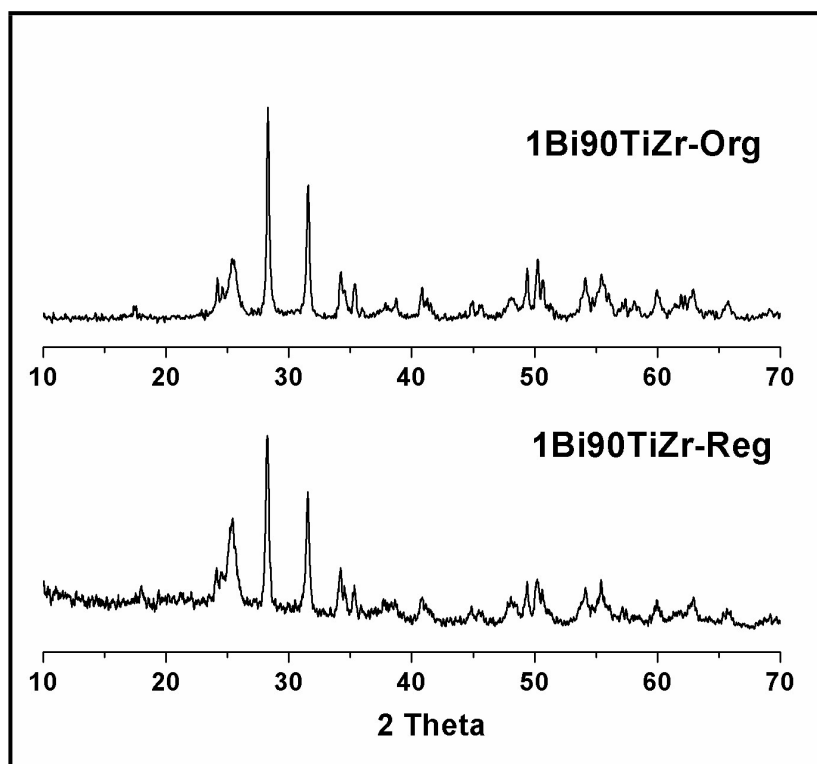

S9. XRD of original and regenerated 1Bi90TiZr.
